# Supplementary material for: Comprehensive analysis of the expression profile and clinical implications of regulator of chromosome condensation 2 in pan-cancers
Source: PubMed Central journal article supplement (PMC9740375; doi:10.18632/aging.204403), 2022-11-27
Supplement: aging-14-204403-s002.pdf [file aging-14-204403-s002.pdf]

## SUPPLEMENTARY TABLE

Supplementary Table 1. *RCC2* expression between responders and non-responders of immunotherapy among different cancer types.

| Cancer type                             | Group       | Drug                                    | #Res | #NRes | Log2 (fold change) | P value        |
|-----------------------------------------|-------------|-----------------------------------------|------|-------|--------------------|----------------|
| Melanoma                                | all         | Anti-PD-1 (pembrolizumab and nivolumab) | 14   | 12    | -0.044             | 0.84           |
| Melanoma                                | MAPKi       | Anti-PD-1 (pembrolizumab and nivolumab) | 6    | 5     | 0.065              | 0.981          |
| Melanoma                                | non-MAPKi   | Anti-PD-1 (pembrolizumab and nivolumab) | 8    | 7     | -0.122             | 0.952          |
| Urothelial cancer                       | all         | Anti-PD-L1 (atezolizumab)               | 9    | 16    | 0.409              | 0.347          |
| Urothelial cancer                       | smoking     | Anti-PD-L1 (atezolizumab)               | 5    | 9     | 0.481              | 0.823          |
| Urothelial cancer                       | non-smoking | Anti-PD-L1 (atezolizumab)               | 4    | 7     | 0.323              | 0.911          |
| Melanoma                                | all         | Anti-PD-1 (nivolumab)                   | 26   | 23    | 0.032              | 0.945          |
| Melanoma                                | NIV3-PROG   | Anti-PD-1 (nivolumab)                   | 15   | 11    | -0.247             | 0.907          |
| Melanoma                                | NIV3-NAIVE  | Anti-PD-1 (nivolumab)                   | 11   | 12    | 0.355              | 0.88           |
| Clear cell renal cell carcinoma (ccRCC) | all         | Anti-PD-1 (nivolumab)                   | 4    | 8     | 0.968              | 0.554          |
| Clear cell renal cell carcinoma (ccRCC) | VEGFRi      | Anti-PD-1 (nivolumab)                   | 2    | 0     | 0                  | 1              |
| Clear cell renal cell carcinoma (ccRCC) | non-VEGFRi  | Anti-PD-1 (nivolumab)                   | 2    | 8     | 1.241              | 0.618          |
| Urothelial cancer                       | all         | Anti-PD-L1 (atezolizumab)               | 68   | 230   | 0.208              | <b>0.00133</b> |

#Res represents the number of responders; #NRes means the number of non-responders.
